# Supplementary material
Source: publisher site journal article supplement (https://www.dovepress.com/article/338107)
Supplement: Supplementary file 1 [file get_supplementary_file.php]

**Supplementary materials**

**Table S1** Proteins identified from JTG

| **No.** | **Accession** | **Average Mass** | **Description** |
| --- | --- | --- | --- |
| 1 | Q29011|PGCA_PIG | 58605.31 | Aggrecan core protein (Fragments) OS=Sus scrofa OX=9823 GN=ACAN PE=1 SV=3 |
| 2 | P16276|ACON_PIG | 85760.914 | Aconitate hydratase, mitochondrial OS=Sus scrofa OX=9823 GN=ACO2 PE=1 SV=1 |
| 3 | Q5D891|PK3C3_PIG | 101234.164 | Phosphatidylinositol 3-kinase catalytic subunit type 3 OS=Sus scrofa OX=9823 GN=PIK3C3 PE=2 SV=1 |
| 4 | P04175|NCPR_PIG | 76832.64 | NADPH--cytochrome P450 reductase OS=Sus scrofa OX=9823 GN=POR PE=1 SV=2 |
| 5 | P80276|ALDR_PIG | 35868.254 | Aldo-keto reductase family 1 member B1 OS=Sus scrofa OX=9823 GN=AKR1B1 PE=1 SV=2 |
| 6 | Q28559|ACACA_SHEEP | 265251.47 | Acetyl-CoA carboxylase 1 OS=Ovis aries OX=9940 GN=ACACA PE=2 SV=1 |
| 7 | P62279|RS13_PIG | 12034.232 | 40S ribosomal protein S13 (Fragment) OS=Sus scrofa OX=9823 GN=RPS13 PE=2 SV=2 |
| 8 | F1SRY5|UBP37_PIG | 110482.8 | Ubiquitin carboxyl-terminal hydrolase 37 OS=Sus scrofa OX=9823 GN=USP37 PE=3 SV=1 |
| 9 | Q863Z5|IL4RA_PIG | 89440.836 | Interleukin-4 receptor subunit alpha OS=Sus scrofa OX=9823 GN=IL4R PE=2 SV=1 |
| 10 | O77728|CEBPE_SHEEP | 30638.703 | CCAAT/enhancer-binding protein epsilon OS=Ovis aries OX=9940 GN=CEBPE PE=2 SV=1 |
| 11 | Q4A3R3|DMBT1_PIG | 132224.6 | Deleted in malignant brain tumors 1 protein OS=Sus scrofa OX=9823 GN=DMBT1 PE=2 SV=1 |
| 12 | Q9GLV6|DDX58_PIG | 107584.164 | Antiviral innate immune response receptor RIG-I OS=Sus scrofa OX=9823 GN=DDX58 PE=2 SV=1 |
| 13 | P00377|DYR_PIG | 21454.787 | Dihydrofolate reductase OS=Sus scrofa OX=9823 GN=DHFR PE=1 SV=1 |
| 14 | P27594|MX1_PIG | 75587.37 | Interferon-induced GTP-binding protein Mx1 OS=Sus scrofa OX=9823 GN=MX1 PE=2 SV=1 |
| 15 | A5GFW5|CASS4_PIG | 86278.58 | Cas scaffolding protein family member 4 OS=Sus scrofa OX=9823 GN=CASS4 PE=3 SV=1 |
| 16 | Q29223|RL34_PIG | 13292.949 | 60S ribosomal protein L34 OS=Sus scrofa OX=9823 GN=RPL34 PE=1 SV=3 |
| 17 | Q6S4N2|HS71B_PIG | 70098.305 | Heat shock 70 kDa protein 1B OS=Sus scrofa OX=9823 GN=HSPA1B PE=2 SV=1 |
| 18 | P34930|HS71A_PIG | 70083.25 | Heat shock 70 kDa protein 1A OS=Sus scrofa OX=9823 GN=HSPA1A PE=3 SV=1 |
| 19 | Q99028|COMT_PIG | 20586.809 | Catechol O-methyltransferase (Fragment) OS=Sus scrofa OX=9823 GN=COMT PE=1 SV=1 |
| 20 | Q9BDY8|ANGP1_PIG | 57412.824 | Angiopoietin-1 OS=Sus scrofa OX=9823 GN=ANGPT1 PE=2 SV=1 |
| 21 | Q02038|NEUL_PIG | 80756.766 | Neurolysin, mitochondrial OS=Sus scrofa OX=9823 GN=NLN PE=1 SV=1 |
| 22 | Q2MJV8|PALM_PIG | 42380.293 | Paralemmin-1 OS=Sus scrofa OX=9823 GN=PALM PE=2 SV=1 |
| 23 | P02080|HBBN_AMMLE | 15590.232 | Hemoglobin subunit beta-C(NA) OS=Ammotragus lervia OX=9899 PE=1 SV=1 |
| 24 | P49920|CBG_SHEEP | 48056.125 | Corticosteroid-binding globulin OS=Ovis aries OX=9940 GN=SERPINA6 PE=2 SV=1 |
| 25 | A5A761|SFXN1_PIG | 35624.395 | Sideroflexin-1 OS=Sus scrofa OX=9823 GN=SFXN1 PE=2 SV=1 |
| 26 | B0KYV5|LIMA1_PIG | 83990.44 | LIM domain and actin-binding protein 1 OS=Sus scrofa OX=9823 GN=LIMA1 PE=2 SV=1 |
| 27 | Q28990|OVGP1_PIG | 58519.32 | Oviduct-specific glycoprotein OS=Sus scrofa OX=9823 GN=OVGP1 PE=2 SV=1 |
| 28 | Q28600|HXA7_SHEEP | 8888.204 | Homeobox protein Hox-A7 (Fragment) OS=Ovis aries OX=9940 GN=HOXA7 PE=2 SV=1 |
| 29 | Q3S853|RGS2_PIG | 24389.846 | Regulator of G-protein signaling 2 OS=Sus scrofa OX=9823 GN=RGS2 PE=2 SV=2 |
| 30 | P10173|FUMH_PIG | 54749.062 | Fumarate hydratase, mitochondrial OS=Sus scrofa OX=9823 GN=FH PE=1 SV=2 |
| 31 | Q5BLZ2|PLIN3_PIG | 47899.973 | Perilipin-3 OS=Sus scrofa OX=9823 GN=PLIN3 PE=2 SV=1 |
| 32 | P00690|AMYP_PIG | 57086.2 | Pancreatic alpha-amylase OS=Sus scrofa OX=9823 GN=AMY2 PE=1 SV=3 |
| 33 | Q6R6L0|BEGIN_SHEEP | 70853.82 | Brain-enriched guanylate kinase-associated protein OS=Ovis aries OX=9940 GN=BEGAIN PE=2 SV=1 |
| 34 | P14287|OSTP_PIG | 33668.652 | Osteopontin OS=Sus scrofa OX=9823 GN=SPP1 PE=1 SV=1 |
| 35 | P14082|BDNF_PIG | 28287.355 | Brain-derived neurotrophic factor OS=Sus scrofa OX=9823 GN=BDNF PE=1 SV=1 |
| 36 | Q7YRV6|SOCS2_PIG | 22254.412 | Suppressor of cytokine signaling 2 OS=Sus scrofa OX=9823 GN=SOCS2 PE=2 SV=1 |
| 37 | Q04967|HSP76_PIG | 71109.23 | Heat shock 70 kDa protein 6 OS=Sus scrofa OX=9823 GN=HSPA6 PE=1 SV=1 |
| 38 | Q06AV1|NNMT_PIG | 29478.88 | Nicotinamide N-methyltransferase OS=Sus scrofa OX=9823 GN=NNMT PE=2 SV=1 |
| 39 | P54612|2AAA_PIG | 65322.61 | Serine/threonine-protein phosphatase 2A 65 kDa regulatory subunit A alpha isoform OS=Sus scrofa OX=9823 GN=PPP2R1A PE=2 SV=2 |
| 40 | Q8MIR0|TDH_PIG | 41432.344 | L-threonine 3-dehydrogenase, mitochondrial OS=Sus scrofa OX=9823 GN=TDH PE=1 SV=1 |
| 41 | Q28554|G3P_SHEEP | 34731.746 | Glyceraldehyde-3-phosphate dehydrogenase (Fragment) OS=Ovis aries OX=9940 GN=GAPDH PE=2 SV=4 |
| 42 | A0A452E9Y6|PERL_CAPHI | 80365.84 | Lactoperoxidase OS=Capra hircus OX=9925 GN=LPO PE=1 SV=1 |
| 43 | C3RZA1|SMYD2_PIG | 49877.875 | N-lysine methyltransferase SMYD2 OS=Sus scrofa OX=9823 GN=SMYD2 PE=2 SV=1 |
| 44 | O19085|TRI10_PIG | 55462.133 | Tripartite motif-containing protein 10 OS=Sus scrofa OX=9823 GN=TRIM10 PE=3 SV=2 |
| 45 | Q4VYA0|DYLT4_PIG | 22840.035 | Dynein light chain Tctex-type 4 OS=Sus scrofa OX=9823 GN=DYNLT4 PE=2 SV=1 |
| 46 | Q9TUQ3|CO7_PIG | 93062.17 | Complement component C7 OS=Sus scrofa OX=9823 GN=C7 PE=1 SV=1 |
| 47 | O19004|ARAF_PIG | 67538.234 | Serine/threonine-protein kinase A-Raf OS=Sus scrofa OX=9823 GN=ARAF PE=2 SV=1 |
| 48 | P09558|EDN1_PIG | 23258.766 | Endothelin-1 OS=Sus scrofa OX=9823 GN=EDN1 PE=1 SV=1 |
| 49 | P55204|GUC2C_PIG | 123219.77 | Heat-stable enterotoxin receptor OS=Sus scrofa OX=9823 GN=GUCY2C PE=2 SV=2 |
| 50 | Q9XT58|ADRB3_SHEEP | 42928.312 | Beta-3 adrenergic receptor OS=Ovis aries OX=9940 GN=ADRB3 PE=3 SV=2 |
| 51 | P49927|PRIO_PIG | 27727.209 | Major prion protein OS=Sus scrofa OX=9823 GN=PRNP PE=1 SV=1 |
| 52 | O02734|HMCS2_PIG | 56933.79 | Hydroxymethylglutaryl-CoA synthase, mitochondrial OS=Sus scrofa OX=9823 GN=HMGCS2 PE=2 SV=1 |
| 53 | P34994|SSR2_PIG | 41218.61 | Somatostatin receptor type 2 OS=Sus scrofa OX=9823 GN=SSTR2 PE=3 SV=1 |
| 54 | P79385|MFGM_PIG | 45724.902 | Lactadherin OS=Sus scrofa OX=9823 GN=MFGE8 PE=1 SV=2 |
| 55 | P19133|FRIL_PIG | 8784.025 | Ferritin light chain (Fragment) OS=Sus scrofa OX=9823 GN=FTL PE=1 SV=1 |
| 56 | Q9MZU4|RSAD2_PIG | 41863.914 | Radical S-adenosyl methionine domain-containing protein 2 OS=Sus scrofa OX=9823 GN=RSAD2 PE=1 SV=1 |
| 57 | Q7YS99|OPTN_PIG | 65703.27 | Optineurin OS=Sus scrofa OX=9823 GN=OPTN PE=1 SV=1 |
| 58 | Q29218|K1C20_PIG | 12528.139 | Keratin, type I cytoskeletal 20 (Fragment) OS=Sus scrofa OX=9823 GN=KRT20 PE=2 SV=1 |
| 59 | Q767K6|DHX16_PIG | 119647.91 | Pre-mRNA-splicing factor ATP-dependent RNA helicase DHX16 OS=Sus scrofa OX=9823 GN=DHX16 PE=3 SV=1 |
| 60 | P01165|7B2_PIG | 23224.072 | Neuroendocrine protein 7B2 OS=Sus scrofa OX=9823 GN=SCG5 PE=1 SV=2 |
| 61 | Q9MZS9|KMO_PIG | 53997.547 | Kynurenine 3-monooxygenase OS=Sus scrofa OX=9823 GN=KMO PE=2 SV=2 |
| 62 | Q29121|GALT1_PIG | 64118.83 | Polypeptide N-acetylgalactosaminyltransferase 1 OS=Sus scrofa OX=9823 GN=GALNT1 PE=2 SV=1 |
| 63 | D5K8A2|MIEAP_PIG | 63300.37 | Mitochondria-eating protein OS=Sus scrofa OX=9823 GN=SPATA18 PE=2 SV=1 |
| 64 | Q00968|EGF_PIG | 133506.11 | Pro-epidermal growth factor OS=Sus scrofa OX=9823 GN=EGF PE=1 SV=2 |
| 65 | P79292|OPRX_PIG | 40610.176 | Nociceptin receptor OS=Sus scrofa OX=9823 GN=OPRL1 PE=2 SV=1 |
| 66 | Q70TH4|SPP24_SHEEP | 23272.291 | Secreted phosphoprotein 24 OS=Ovis aries OX=9940 GN=SPP2 PE=2 SV=1 |
| 67 | A2TJ54|CLN5_SHEEP | 41315.34 | Ceroid-lipofuscinosis neuronal protein 5 OS=Ovis aries OX=9940 GN=CLN5 PE=2 SV=1 |
| 68 | Q8HY46|CPT1B_PIG | 88230.39 | Carnitine O-palmitoyltransferase 1, muscle isoform OS=Sus scrofa OX=9823 GN=CPT1B PE=2 SV=1 |
| 69 | Q28566|MYC_SHEEP | 48474.773 | Myc proto-oncogene protein OS=Ovis aries OX=9940 GN=MYC PE=2 SV=1 |
| 70 | Q29555|GNMT_PIG | 32548.02 | Glycine N-methyltransferase (Fragment) OS=Sus scrofa OX=9823 GN=GNMT PE=2 SV=1 |
| 71 | Q28586|IL5_SHEEP | 14974.387 | Interleukin-5 OS=Ovis aries OX=9940 GN=IL5 PE=2 SV=1 |
| 72 | P98074|ENTK_PIG | 114776.25 | Enteropeptidase OS=Sus scrofa OX=9823 GN=TMPRSS15 PE=1 SV=1 |
| 73 | Q9MZ16|VDAC1_PIG | 30726.504 | Voltage-dependent anion-selective channel protein 1 OS=Sus scrofa OX=9823 GN=VDAC1 PE=2 SV=3 |
| 74 | Q03472|APOR_PIG | 22724.465 | Apolipoprotein R OS=Sus scrofa OX=9823 GN=APOR PE=1 SV=1 |
| 75 | Q3MQ04|ATG5_PIG | 32433.25 | Autophagy protein 5 OS=Sus scrofa OX=9823 GN=ATG5 PE=2 SV=1 |
| 76 | Q767M3|SYVM_PIG | 118287.66 | Valine--tRNA ligase, mitochondrial OS=Sus scrofa OX=9823 GN=VARS2 PE=3 SV=1 |
| 77 | P82460|THIO_PIG | 11828.6045 | Thioredoxin OS=Sus scrofa OX=9823 GN=TXN PE=1 SV=3 |
| 78 | P01351|GAST_PIG | 11557.959 | Gastrin OS=Sus scrofa OX=9823 GN=GAST PE=1 SV=1 |
| 79 | Q8HZV3|TFR1_PIG | 86122.01 | Transferrin receptor protein 1 OS=Sus scrofa OX=9823 GN=TFRC PE=2 SV=1 |
| 80 | Q2QLE0|MET_PIG | 154748.39 | Hepatocyte growth factor receptor OS=Sus scrofa OX=9823 GN=MET PE=2 SV=1 |
| 81 | B5KFD7|GRB10_PIG | 66386.36 | Growth factor receptor-bound protein 10 OS=Sus scrofa OX=9823 GN=Grb10 PE=2 SV=1 |
| 82 | P41367|ACADM_PIG | 46485.145 | Medium-chain specific acyl-CoA dehydrogenase, mitochondrial OS=Sus scrofa OX=9823 GN=ACADM PE=1 SV=3 |
| 83 | P10859|HPLN1_PIG | 40260.656 | Hyaluronan and proteoglycan link protein 1 OS=Sus scrofa OX=9823 GN=HAPLN1 PE=2 SV=1 |
| 84 | P50127|GGTA1_PIG | 43763.883 | N-acetyllactosaminide alpha-1,3-galactosyltransferase OS=Sus scrofa OX=9823 GN=GGTA1 PE=2 SV=1 |
| 85 | P20003|FGF2_SHEEP | 17279.85 | Fibroblast growth factor 2 OS=Ovis aries OX=9940 GN=FGF2 PE=1 SV=2 |
| 86 | P51664|P53_SHEEP | 42809.258 | Cellular tumor antigen p53 OS=Ovis aries OX=9940 GN=TP53 PE=2 SV=1 |
| 87 | Q02110|HPPD_PIG | 45064.273 | 4-hydroxyphenylpyruvate dioxygenase OS=Sus scrofa OX=9823 GN=HPD PE=1 SV=4 |
| 88 | P43368|CAN3_PIG | 94551.04 | Calpain-3 OS=Sus scrofa OX=9823 GN=CAPN3 PE=2 SV=2 |
| 89 | Q9TTH8|CAN3_SHEEP | 94595.06 | Calpain-3 OS=Ovis aries OX=9940 GN=CAPN3 PE=2 SV=1 |
| 90 | O19071|MGAT2_PIG | 51527.094 | Alpha-1,6-mannosyl-glycoprotein 2-beta-N-acetylglucosaminyltransferase OS=Sus scrofa OX=9823 GN=MGAT2 PE=3 SV=1 |
| 91 | Q5MNU5|SCAP_PIG | 140058.34 | Sterol regulatory element-binding protein cleavage-activating protein OS=Sus scrofa OX=9823 GN=SCAP PE=2 SV=2 |
| 92 | P17560|RENBP_PIG | 46402.07 | N-acylglucosamine 2-epimerase OS=Sus scrofa OX=9823 GN=RENBP PE=1 SV=2 |
| 93 | D5K8A9|SACA1_PIG | 32239.453 | Sperm acrosome membrane-associated protein 1 OS=Sus scrofa OX=9823 GN=SPACA1 PE=1 SV=1 |
| 94 | P52210|ALDOB_SHEEP | 39631.14 | Fructose-bisphosphate aldolase B OS=Ovis aries OX=9940 GN=ALDOB PE=2 SV=2 |
| 95 | P79273|ACADS_PIG | 44850.84 | Short-chain specific acyl-CoA dehydrogenase, mitochondrial OS=Sus scrofa OX=9823 GN=ACADS PE=2 SV=1 |
| 96 | P84024|SMAD3_PIG | 48080.75 | Mothers against decapentaplegic homolog 3 OS=Sus scrofa OX=9823 GN=SMAD3 PE=2 SV=1 |
| 97 | Q29122|MYO6_PIG | 144858.56 | Unconventional myosin-VI OS=Sus scrofa OX=9823 GN=MYO6 PE=1 SV=1 |
| 98 | Q06AK6|TFP11_PIG | 96500.5 | Tuftelin-interacting protein 11 OS=Sus scrofa OX=9823 GN=TFIP11 PE=2 SV=1 |
| 99 | A7WLH8|SUMO1_PIG | 11556.984 | Small ubiquitin-related modifier 1 OS=Sus scrofa OX=9823 GN=SUMO1 PE=3 SV=1 |
| 100 | Q9MZD5|SUMO1_CERNI | 11565.995 | Small ubiquitin-related modifier 1 OS=Cervus nippon OX=9863 GN=SUMO1 PE=3 SV=1 |
| 101 | Q2TLZ2|MACOI_PIG | 76147.52 | Macoilin OS=Sus scrofa OX=9823 GN=MACO1 PE=2 SV=1 |
| 102 | Q70IB1|RNS10_SHEEP | 23486.209 | Inactive ribonuclease-like protein 10 OS=Ovis aries OX=9940 GN=RNASE10 PE=2 SV=2 |
| 103 | O19063|SAMP_PIG | 25641.486 | Serum amyloid P-component OS=Sus scrofa OX=9823 GN=APCS PE=2 SV=1 |
| 104 | Q9GKE7|CLCN5_PIG | 90802.3 | H(+)/Cl(-) exchange transporter 5 OS=Sus scrofa OX=9823 GN=CLCN5 PE=2 SV=2 |
| 105 | Q865B6|PRGC1_PIG | 90336.01 | Peroxisome proliferator-activated receptor gamma coactivator 1-alpha OS=Sus scrofa OX=9823 GN=PPARGC1A PE=2 SV=1 |
| 106 | P50828|HEMO_PIG | 51305.69 | Hemopexin OS=Sus scrofa OX=9823 GN=HPX PE=1 SV=1 |
| 107 | Q29477|TRFL_CAPHI | 77358.32 | Lactotransferrin OS=Capra hircus OX=9925 GN=LTF PE=1 SV=1 |
| 108 | P34935|BIP_PIG | 28911.57 | Endoplasmic reticulum chaperone BiP (Fragment) OS=Sus scrofa OX=9823 GN=HSPA5 PE=2 SV=2 |
| 109 | Q0MUU2|SMPX_PIG | 9345.758 | Small muscular protein OS=Sus scrofa OX=9823 GN=SMPX PE=2 SV=1 |
| 110 | O18882|VATL_SHEEP | 15692.784 | V-type proton ATPase 16 kDa proteolipid subunit OS=Ovis aries OX=9940 GN=ATP6V0C PE=2 SV=1 |
| 111 | Q29108|ZPBP1_PIG | 39623.95 | Zona pellucida-binding protein 1 OS=Sus scrofa OX=9823 GN=ZPBP PE=2 SV=1 |
| 112 | P67934|TKNK_PIG | 13650.696 | Neurokinin-B OS=Sus scrofa OX=9823 GN=TAC3 PE=1 SV=2 |
| 113 | P50578|AK1A1_PIG | 36582.035 | Aldo-keto reductase family 1 member A1 OS=Sus scrofa OX=9823 GN=AKR1A1 PE=1 SV=3 |
| 114 | Q8SPR7|PLCD4_PIG | 88075.28 | 1-phosphatidylinositol 4,5-bisphosphate phosphodiesterase delta-4 OS=Sus scrofa OX=9823 GN=PLCD4 PE=2 SV=1 |
| 115 | P79303|UGPA_PIG | 56961.03 | UTP--glucose-1-phosphate uridylyltransferase OS=Sus scrofa OX=9823 GN=UGP2 PE=2 SV=3 |
| 116 | Q9MYZ9|EPOR_PIG | 55183.5 | Erythropoietin receptor OS=Sus scrofa OX=9823 GN=EPOR PE=2 SV=1 |
| 117 | Q9TU15|ESR2_SHEEP | 59120.117 | Estrogen receptor beta OS=Ovis aries OX=9940 GN=ESR2 PE=2 SV=1 |
| 118 | O97507|FA12_PIG | 68012.31 | Coagulation factor XII OS=Sus scrofa OX=9823 GN=F12 PE=2 SV=1 |
| 119 | Q9N1X4|SFTPD_PIG | 37985.633 | Pulmonary surfactant-associated protein D OS=Sus scrofa OX=9823 GN=SFTPD PE=1 SV=1 |
| 120 | Q9TTJ7|KCNQ1_PIG | 74031.72 | Potassium voltage-gated channel subfamily KQT member 1 OS=Sus scrofa OX=9823 GN=KCNQ1 PE=2 SV=2 |
| 121 | B8Y466|SRPK3_PIG | 61904.97 | SRSF protein kinase 3 OS=Sus scrofa OX=9823 GN=SRPK3 PE=2 SV=1 |
| 122 | Q8WNV7|DHRS4_PIG | 29918.604 | Dehydrogenase/reductase SDR family member 4 OS=Sus scrofa OX=9823 GN=DHRS4 PE=1 SV=2 |
| 123 | Q1W674|HXK2_PIG | 102369.94 | Hexokinase-2 OS=Sus scrofa OX=9823 GN=HK2 PE=2 SV=1 |
| 124 | Q0QF01|SDHA_PIG | 72831.62 | Succinate dehydrogenase [ubiquinone] flavoprotein subunit, mitochondrial OS=Sus scrofa OX=9823 GN=SDHA PE=1 SV=2 |
| 125 | P29258|STP2_PIG | 15300.951 | Nuclear transition protein 2 OS=Sus scrofa OX=9823 GN=TNP2 PE=2 SV=1 |
| 126 | Q29126|WAP3_PIG | 15634.313 | Protein WAP-3 OS=Sus scrofa OX=9823 PE=2 SV=1 |
| 127 | P24786|NTRK3_PIG | 93129.695 | NT-3 growth factor receptor OS=Sus scrofa OX=9823 GN=NTRK3 PE=2 SV=1 |
| 128 | B5SNZ6|ABRA_PIG | 43568.723 | Actin-binding Rho-activating protein OS=Sus scrofa OX=9823 GN=ABRA PE=2 SV=1 |
| 129 | Q2HY40|TXNIP_PIG | 43810.625 | Thioredoxin-interacting protein OS=Sus scrofa OX=9823 GN=TXNIP PE=2 SV=1 |
| 130 | O62667|S28A1_PIG | 70823.03 | Sodium/nucleoside cotransporter 1 OS=Sus scrofa OX=9823 GN=SLC28A1 PE=2 SV=1 |
| 131 | Q29236|TCPZ_PIG | 10945.409 | T-complex protein 1 subunit zeta (Fragment) OS=Sus scrofa OX=9823 GN=CCT6 PE=2 SV=1 |
| 132 | Q863D9|SRY_ALCAC | 26828.225 | Sex-determining region Y protein OS=Alces alces cameloides OX=162953 GN=SRY PE=3 SV=1 |
| 133 | Q863C2|SRY_AXIPR | 26750.1 | Sex-determining region Y protein OS=Axis porcinus OX=57737 GN=SRY PE=3 SV=1 |
| 134 | Q863B7|SRY_ELADA | 26668.936 | Sex-determining region Y protein OS=Elaphurus davidianus OX=43332 GN=SRY PE=3 SV=1 |
| 135 | Q863C0|SRY_PRZAL | 26796.082 | Sex-determining region Y protein OS=Przewalskium albirostris OX=1088058 GN=SRY PE=3 SV=1 |
| 136 | Q9BH08|SRY_CERNI | 26731.951 | Sex-determining region Y protein OS=Cervus nippon OX=9863 GN=SRY PE=3 SV=1 |
| 137 | Q28558|MTR1L_SHEEP | 62809.742 | Melatonin-related receptor OS=Ovis aries OX=9940 GN=GPR50 PE=2 SV=2 |
| 138 | Q29552|C11B1_PIG | 57339.887 | Cytochrome P450 11B1, mitochondrial OS=Sus scrofa OX=9823 GN=CYP11B1 PE=2 SV=1 |
| 139 | P49925|HXC6_SHEEP | 17803.861 | Homeobox protein Hox-C6 OS=Ovis aries OX=9940 GN=HOXC6 PE=2 SV=1 |
| 140 | E1CHH8|VRTN_PIG | 77846.71 | Vertnin OS=Sus scrofa OX=9823 GN=VRTN PE=2 SV=1 |
| 141 | Q4PLW0|PLIN2_PIG | 50195.797 | Perilipin-2 OS=Sus scrofa OX=9823 GN=PLIN2 PE=2 SV=1 |
| 142 | Q5PXT2|LMCD1_PIG | 40659.52 | LIM and cysteine-rich domains protein 1 OS=Sus scrofa OX=9823 GN=LMCD1 PE=2 SV=1 |
| 143 | P10612|CP11A_PIG | 60257.73 | Cholesterol side-chain cleavage enzyme, mitochondrial OS=Sus scrofa OX=9823 GN=CYP11A1 PE=1 SV=1 |
| 144 | O18796|IL6RA_PIG | 51066.656 | Interleukin-6 receptor subunit alpha OS=Sus scrofa OX=9823 GN=IL6R PE=2 SV=2 |
| 145 | P79204|MCPT2_SHEEP | 27145.752 | Mast cell protease 2 OS=Ovis aries OX=9940 PE=2 SV=1 |
| 146 | A0P8Z5|UIMC1_PIG | 79862.69 | BRCA1-A complex subunit RAP80 OS=Sus scrofa OX=9823 GN=UIMC1 PE=1 SV=1 |
| 147 | Q9GJX5|CP4AL_PIG | 57215.617 | Taurochenodeoxycholic 6 alpha-hydroxylase OS=Sus scrofa OX=9823 GN=CYP4A21 PE=1 SV=1 |
| 148 | Q8SPK0|CP4AP_PIG | 57323.67 | Cytochrome P450 4A25 OS=Sus scrofa OX=9823 GN=CYP4A25 PE=2 SV=1 |
| 149 | Q8SPK1|CP4AO_PIG | 57199.4 | Cytochrome P450 4A24 OS=Sus scrofa OX=9823 GN=CYP4A24 PE=2 SV=1 |
| 150 | O97581|LHX3_PIG | 41825.168 | LIM/homeobox protein Lhx3 (Fragment) OS=Sus scrofa OX=9823 GN=LHX3 PE=2 SV=1 |
| 151 | P79153|CP11A_CAPHI | 60417.88 | Cholesterol side-chain cleavage enzyme, mitochondrial OS=Capra hircus OX=9925 GN=CYP11A1 PE=2 SV=1 |
| 152 | P79202|CP11A_SHEEP | 60356.934 | Cholesterol side-chain cleavage enzyme, mitochondrial OS=Ovis aries OX=9940 GN=CYP11A1 PE=1 SV=1 |
| 153 | P22298|SLPI_PIG | 13926.54 | Antileukoproteinase (Fragment) OS=Sus scrofa OX=9823 GN=SLPI PE=1 SV=2 |
| 154 | A5GFT6|TSH2_PIG | 114601.67 | Teashirt homolog 2 OS=Sus scrofa OX=9823 GN=TSHZ2 PE=3 SV=1 |
| 155 | Q866Y3|PGRP2_PIG | 64593.605 | N-acetylmuramoyl-L-alanine amidase OS=Sus scrofa OX=9823 GN=PGLYRP2 PE=2 SV=1 |
| 156 | P34934|HSP7X_PIG | 42289.836 | Heat shock 70 kDa protein (Fragment) OS=Sus scrofa OX=9823 PE=2 SV=1 |
| 157 | O02849|PADI3_SHEEP | 74747.19 | Protein-arginine deiminase type-3 OS=Ovis aries OX=9940 GN=PADI3 PE=1 SV=1 |
| 158 | P68251|1433B_SHEEP | 22053.594 | 14-3-3 protein beta/alpha (Fragments) OS=Ovis aries OX=9940 GN=YWHAB PE=1 SV=2 |
| 159 | P32307|V2R_PIG | 40537.46 | Vasopressin V2 receptor OS=Sus scrofa OX=9823 GN=AVPR2 PE=2 SV=1 |
| 160 | Q5I2P5|MX2_SHEEP | 81680.83 | Interferon-induced GTP-binding protein Mx2 OS=Ovis aries OX=9940 GN=MX2 PE=2 SV=1 |
| 161 | O97562|UCP2_PIG | 33259.375 | Mitochondrial uncoupling protein 2 OS=Sus scrofa OX=9823 GN=UCP2 PE=2 SV=1 |
| 162 | F1RKQ4|TKFC_PIG | 59234.316 | Triokinase/FMN cyclase OS=Sus scrofa OX=9823 GN=TKFC PE=1 SV=2 |
| 163 | P12675|ICAL_PIG | 77123.6 | Calpastatin OS=Sus scrofa OX=9823 GN=CAST PE=1 SV=1 |
| 164 | Q95208|ICAL_SHEEP | 78998.89 | Calpastatin OS=Ovis aries OX=9940 GN=CAST PE=2 SV=1 |
| 165 | P30930|LCAT_PIG | 21276.195 | Phosphatidylcholine-sterol acyltransferase (Fragments) OS=Sus scrofa OX=9823 GN=LCAT PE=1 SV=1 |
| 166 | P68220|IL12B_SHEEP | 36936.71 | Interleukin-12 subunit beta OS=Ovis aries OX=9940 GN=IL12B PE=1 SV=1 |
| 167 | Q28234|IL12B_CEREL | 37145.043 | Interleukin-12 subunit beta OS=Cervus elaphus OX=9860 GN=IL12B PE=2 SV=1 |
| 168 | P68221|IL12B_CAPHI | 36936.71 | Interleukin-12 subunit beta OS=Capra hircus OX=9925 GN=IL12B PE=2 SV=1 |
| 169 | Q6ITT4|MAGD1_PIG | 86532.53 | Melanoma-associated antigen D1 OS=Sus scrofa OX=9823 GN=MAGED1 PE=2 SV=1 |
| 170 | Q9XSY9|OSTP_SHEEP | 31052.031 | Osteopontin OS=Ovis aries OX=9940 GN=SPP1 PE=2 SV=1 |
| 171 | P63246|RACK1_PIG | 35076.723 | Receptor of activated protein C kinase 1 OS=Sus scrofa OX=9823 GN=RACK1 PE=1 SV=3 |
| 172 | Q9GL76|NECT1_PIG | 57047.113 | Nectin-1 OS=Sus scrofa OX=9823 GN=NECTIN1 PE=1 SV=1 |
| 173 | P01356|CCKN_PIG | 12526.238 | Cholecystokinin OS=Sus scrofa OX=9823 GN=CCK PE=1 SV=1 |
| 174 | P25691|K2M3_SHEEP | 55255.266 | Keratin, type II microfibrillar, component 5 OS=Ovis aries OX=9940 PE=1 SV=1 |
| 175 | P53590|SUCB2_PIG | 46802.973 | Succinate--CoA ligase [GDP-forming] subunit beta, mitochondrial (Fragment) OS=Sus scrofa OX=9823 GN=SUCLG2 PE=1 SV=2 |
| 176 | Q2XSV9|GNA11_PIG | 42064.312 | Guanine nucleotide-binding protein subunit alpha-11 OS=Sus scrofa OX=9823 GN=GNA11 PE=2 SV=2 |
| 177 | Q710C4|SAHH_PIG | 47694.03 | Adenosylhomocysteinase OS=Sus scrofa OX=9823 GN=AHCY PE=3 SV=3 |
| 178 | Q52NJ0|PRAF1_PIG | 20664.975 | Prenylated Rab acceptor protein 1 OS=Sus scrofa OX=9823 GN=RABAC1 PE=2 SV=1 |
| 179 | Q2EN75|S10A6_PIG | 10059.595 | Protein S100-A6 OS=Sus scrofa OX=9823 GN=S100A6 PE=3 SV=1 |
| 180 | P20305|GELS_PIG | 84775.39 | Gelsolin (Fragment) OS=Sus scrofa OX=9823 GN=GSN PE=1 SV=1 |
| 181 | Q9N1F5|GSTO1_PIG | 27418.79 | Glutathione S-transferase omega-1 OS=Sus scrofa OX=9823 GN=GSTO1 PE=1 SV=2 |
| 182 | A4L7N3|FOXO1_PIG | 69920.82 | Forkhead box protein O1 OS=Sus scrofa OX=9823 GN=FOXO1 PE=2 SV=1 |
| 183 | P50441|GATM_PIG | 48360.406 | Glycine amidinotransferase, mitochondrial OS=Sus scrofa OX=9823 GN=GATM PE=1 SV=2 |
| 184 | P42098|ZP3_PIG | 46238.95 | Zona pellucida sperm-binding protein 3 OS=Sus scrofa OX=9823 GN=ZP3 PE=1 SV=1 |
| 185 | Q19S50|STAT3_PIG | 88066.766 | Signal transducer and activator of transcription 3 OS=Sus scrofa OX=9823 GN=STAT3 PE=1 SV=1 |
| 186 | Q8HXW0|GGLO_PIG | 50352.344 | L-gulonolactone oxidase OS=Sus scrofa OX=9823 GN=GULO PE=2 SV=3 |
| 187 | P00791|PEPA_PIG | 41262.09 | Pepsin A OS=Sus scrofa OX=9823 GN=PGA PE=1 SV=3 |
| 188 | P26044|RADI_PIG | 68549.79 | Radixin OS=Sus scrofa OX=9823 GN=RDX PE=2 SV=1 |
| 189 | P15241|K2M2_SHEEP | 53681.832 | Keratin, type II microfibrillar, component 7C OS=Ovis aries OX=9940 PE=1 SV=1 |
| 190 | Q8MIA3|S35A4_PIG | 34224.61 | Probable UDP-sugar transporter protein SLC35A4 OS=Sus scrofa OX=9823 GN=SLC35A4 PE=2 SV=1 |
| 191 | P0C276|RL40_SHEEP | 14728.311 | Ubiquitin-60S ribosomal protein L40 OS=Ovis aries OX=9940 GN=UBA52 PE=2 SV=2 |
| 192 | P63053|RL40_PIG | 14728.311 | Ubiquitin-60S ribosomal protein L40 OS=Sus scrofa OX=9823 GN=UBA52 PE=1 SV=2 |
| 193 | P0CG55|UBB_SHEEP | 34326.5 | Polyubiquitin-B OS=Ovis aries OX=9940 GN=UBB PE=2 SV=1 |
| 194 | P0CG68|UBC_PIG | 59992.996 | Polyubiquitin-C OS=Sus scrofa OX=9823 GN=UBC PE=2 SV=1 |
| 195 | P04088|INHBB_PIG | 45037.582 | Inhibin beta B chain OS=Sus scrofa OX=9823 GN=INHBB PE=1 SV=2 |
| 196 | Q03333|NEC2_PIG | 70451.984 | Neuroendocrine convertase 2 OS=Sus scrofa OX=9823 GN=PCSK2 PE=2 SV=1 |
| 197 | P19756|GHR_PIG | 71145.125 | Growth hormone receptor OS=Sus scrofa OX=9823 GN=GHR PE=1 SV=1 |
| 198 | P79295|MIS_PIG | 61504.965 | Muellerian-inhibiting factor OS=Sus scrofa OX=9823 GN=AMH PE=2 SV=2 |
| 199 | Q5U9S1|MBL1_PIG | 26489.117 | Mannose-binding protein A OS=Sus scrofa OX=9823 GN=MBL1 PE=1 SV=1 |
| 200 | F1SR90|SELS_PIG | 21247.863 | Selenoprotein S OS=Sus scrofa OX=9823 GN=SELENOS PE=2 SV=2 |
| 201 | B6CVD7|ERO1A_PIG | 54280.613 | ERO1-like protein alpha OS=Sus scrofa OX=9823 GN=ERO1A PE=2 SV=1 |
| 202 | O62651|WT1_PIG | 49166.184 | Wilms tumor protein homolog OS=Sus scrofa OX=9823 GN=WT1 PE=2 SV=1 |
| 203 | Q9GLG4|SCG1_PIG | 74392.15 | Secretogranin-1 OS=Sus scrofa OX=9823 GN=CHGB PE=1 SV=1 |
| 204 | Q09YI4|WNT2_SHEEP | 40642.62 | Protein Wnt-2 OS=Ovis aries OX=9940 GN=WNT2 PE=3 SV=1 |
| 205 | Q07DW8|WNT2_MUNRE | 40642.62 | Protein Wnt-2 OS=Muntiacus reevesi OX=9886 GN=WNT2 PE=3 SV=1 |
| 206 | Q09YJ6|WNT2_MUNMU | 40642.62 | Protein Wnt-2 OS=Muntiacus muntjak OX=9888 GN=WNT2 PE=3 SV=1 |
| 207 | P68253|1433G_SHEEP | 18000.027 | 14-3-3 protein gamma (Fragments) OS=Ovis aries OX=9940 GN=YWHAG PE=1 SV=1 |
| 208 | Q2IA00|SPEF2_PIG | 208804.44 | Sperm flagellar protein 2 OS=Sus scrofa OX=9823 GN=SPEF2 PE=2 SV=1 |
| 209 | P50751|TNNT2_SHEEP | 33764.37 | Troponin T, cardiac muscle OS=Ovis aries OX=9940 GN=TNNT2 PE=2 SV=2 |
| 210 | Q95239|CASK_RANTA | 13207.999 | Kappa-casein (Fragment) OS=Rangifer tarandus OX=9870 GN=CSN3 PE=2 SV=1 |
| 211 | Q95149|CASK_CEREL | 13271.119 | Kappa-casein (Fragment) OS=Cervus elaphus OX=9860 GN=CSN3 PE=2 SV=1 |
| 212 | Q95184|CASK_ELADA | 13269.103 | Kappa-casein (Fragment) OS=Elaphurus davidianus OX=43332 GN=CSN3 PE=2 SV=1 |
| 213 | Q95191|CASK_MAZAM | 13226.014 | Kappa-casein (Fragment) OS=Mazama americana OX=43334 GN=CSN3 PE=2 SV=1 |
| 214 | Q95228|CASK_ODOVI | 13206.026 | Kappa-casein (Fragment) OS=Odocoileus virginianus virginianus OX=9875 GN=CSN3 PE=2 SV=1 |
| 215 | Q95225|CASK_ODOHE | 13191.956 | Kappa-casein (Fragment) OS=Odocoileus hemionus OX=9872 GN=CSN3 PE=2 SV=1 |
| 216 | Q95146|CASK_CAPCA | 13296.979 | Kappa-casein (Fragment) OS=Capreolus capreolus OX=9858 GN=CSN3 PE=2 SV=1 |
| 217 | P42157|CASK_CERNI | 21377.574 | Kappa-casein OS=Cervus nippon OX=9863 GN=CSN3 PE=2 SV=1 |
| 218 | Q6RI85|PGK2_PIG | 44895.04 | Phosphoglycerate kinase 2 OS=Sus scrofa OX=9823 GN=PGK2 PE=2 SV=3 |
| 219 | P10289|FABP6_PIG | 14219.097 | Gastrotropin OS=Sus scrofa OX=9823 GN=FABP6 PE=1 SV=3 |
| 220 | P51663|C11B1_SHEEP | 57784.266 | Cytochrome P450 11B1, mitochondrial OS=Ovis aries OX=9940 GN=CYP11B1 PE=2 SV=2 |
| 221 | P16582|LSHR_PIG | 78092.39 | Lutropin-choriogonadotropic hormone receptor OS=Sus scrofa OX=9823 GN=LHCGR PE=2 SV=1 |
| 222 | P21814|UTMP_SHEEP | 49223.07 | Uterine milk protein OS=Ovis aries OX=9940 PE=1 SV=2 |
| 223 | P16293|FA9_PIG | 45516.14 | Coagulation factor IX (Fragment) OS=Sus scrofa OX=9823 GN=F9 PE=1 SV=2 |
| 224 | Q9GLP1|FA5_PIG | 256080.19 | Coagulation factor V OS=Sus scrofa OX=9823 GN=F5 PE=2 SV=1 |
| 225 | M3TYT0|ROCK2_PIG | 160749.81 | Rho-associated protein kinase 2 OS=Sus scrofa OX=9823 GN=ROCK2 PE=1 SV=1 |
| 226 | P19619|ANXA1_PIG | 38759.24 | Annexin A1 OS=Sus scrofa OX=9823 GN=ANXA1 PE=1 SV=3 |
| 227 | Q29549|CLUS_PIG | 51774.664 | Clusterin OS=Sus scrofa OX=9823 GN=CLU PE=1 SV=1 |
| 228 | P04574|CPNS1_PIG | 28068.479 | Calpain small subunit 1 OS=Sus scrofa OX=9823 GN=CAPNS1 PE=1 SV=1 |
| 229 | P81140|GCDH_PIG | 45122.652 | Glutaryl-CoA dehydrogenase, mitochondrial (Fragment) OS=Sus scrofa OX=9823 GN=GCDH PE=1 SV=1 |
| 230 | P20192|DGKA_PIG | 82606.06 | Diacylglycerol kinase alpha OS=Sus scrofa OX=9823 GN=DGKA PE=1 SV=1 |
| 231 | Q2I689|PLAL1_PIG | 51058.375 | Zinc finger protein PLAGL1 OS=Sus scrofa OX=9823 GN=PLAGL1 PE=2 SV=1 |
| 232 | P48819|VTNC_PIG | 52572 | Vitronectin OS=Sus scrofa OX=9823 GN=VTN PE=1 SV=1 |
| 233 | Q9BDJ5|VNN1_PIG | 57156.383 | Pantetheinase OS=Sus scrofa OX=9823 GN=VNN1 PE=1 SV=1 |
| 234 | Q0Z8U2|RS3_PIG | 26688.31 | 40S ribosomal protein S3 OS=Sus scrofa OX=9823 GN=RPS3 PE=1 SV=1 |
| 235 | Q95170|OPSR_CAPHI | 40572.297 | Long-wave-sensitive opsin 1 OS=Capra hircus OX=9925 GN=OPN1LW PE=1 SV=1 |
| 236 | O18911|OPSG_ODOVI | 30490.23 | Medium-wave-sensitive opsin 1 (Fragment) OS=Odocoileus virginianus virginianus OX=9875 GN=OPN1MW PE=1 SV=1 |
| 237 | Q29371|TPIS_PIG | 26729.62 | Triosephosphate isomerase OS=Sus scrofa OX=9823 GN=TPI1 PE=2 SV=4 |
| 238 | C0HL13|LRP2_PIG | 521309.06 | Low-density lipoprotein receptor-related protein 2 OS=Sus scrofa OX=9823 GN=LRP2 PE=1 SV=1 |
| 239 | O02705|HS90A_PIG | 84774.8 | Heat shock protein HSP 90-alpha OS=Sus scrofa OX=9823 GN=HSP90AA1 PE=2 SV=3 |
| 240 | O46374|TOP2A_PIG | 174307.25 | DNA topoisomerase 2-alpha OS=Sus scrofa OX=9823 GN=TOP2A PE=2 SV=1 |
| 241 | P04404|CMGA_PIG | 49357.867 | Chromogranin-A (Fragment) OS=Sus scrofa OX=9823 GN=CHGA PE=1 SV=2 |
| 242 | Q9XT90|MMP14_PIG | 65934.06 | Matrix metalloproteinase-14 OS=Sus scrofa OX=9823 GN=MMP14 PE=2 SV=1 |
| 243 | D7PF45|SHIP2_PIG | 138538.14 | Phosphatidylinositol 3,4,5-trisphosphate 5-phosphatase 2 OS=Sus scrofa OX=9823 GN=INPPL1 PE=1 SV=2 |
| 244 | P18648|APOA1_PIG | 30325.38 | Apolipoprotein A-I OS=Sus scrofa OX=9823 GN=APOA1 PE=1 SV=4 |
| 245 | O97939|ENAM_PIG | 128352.38 | Enamelin OS=Sus scrofa OX=9823 GN=ENAM PE=1 SV=1 |
| 246 | Q6YNC8|H2AZ_SHEEP | 13552.734 | Histone H2A.Z OS=Ovis aries OX=9940 GN=H2AZ1 PE=2 SV=3 |
| 247 | P79403|GANAB_PIG | 106661.555 | Neutral alpha-glucosidase AB OS=Sus scrofa OX=9823 GN=GANAB PE=1 SV=1 |
| 248 | Q6YNX6|CALM_SHEEP | 16837.582 | Calmodulin OS=Ovis aries OX=9940 GN=CALM2 PE=2 SV=3 |
| 249 | Q9N0J3|CEBPD_SHEEP | 27040.477 | CCAAT/enhancer-binding protein delta OS=Ovis aries OX=9940 GN=CEBPD PE=3 SV=1 |
| 250 | P08552|NFM_PIG | 51985.492 | Neurofilament medium polypeptide (Fragment) OS=Sus scrofa OX=9823 GN=NEFM PE=1 SV=2 |
| 251 | Q2L969|MTX2_PIG | 30106.434 | Metaxin-2 OS=Sus scrofa OX=9823 GN=MTX2 PE=2 SV=1 |
| 252 | O18751|PYGM_SHEEP | 97307.42 | Glycogen phosphorylase, muscle form OS=Ovis aries OX=9940 GN=PYGM PE=2 SV=3 |
| 253 | Q6Q2C2|HYES_PIG | 62767.38 | Bifunctional epoxide hydrolase 2 OS=Sus scrofa OX=9823 GN=EPHX2 PE=2 SV=1 |
| 254 | P29701|FETUA_SHEEP | 38680.062 | Alpha-2-HS-glycoprotein OS=Ovis aries OX=9940 GN=AHSG PE=1 SV=1 |
| 255 | A7VK00|MX2_PIG | 80327.46 | Interferon-induced GTP-binding protein Mx2 OS=Sus scrofa OX=9823 GN=MX2 PE=2 SV=1 |
| 256 | Q711S8|SPP24_PIG | 23096.969 | Secreted phosphoprotein 24 OS=Sus scrofa OX=9823 GN=SPP2 PE=2 SV=1 |
| 257 | Q29092|ENPL_PIG | 92470.7 | Endoplasmin OS=Sus scrofa OX=9823 GN=HSP90B1 PE=2 SV=3 |
| 258 | Q28542|OVGP1_SHEEP | 59535.527 | Oviduct-specific glycoprotein OS=Ovis aries OX=9940 GN=OVGP1 PE=1 SV=1 |
| 259 | Q95242|PECA1_PIG | 82378.836 | Platelet endothelial cell adhesion molecule OS=Sus scrofa OX=9823 GN=PECAM1 PE=2 SV=1 |
| 260 | P62844|RS15_PIG | 17040.096 | 40S ribosomal protein S15 OS=Sus scrofa OX=9823 GN=RPS15 PE=1 SV=2 |
| 261 | Q6GWX0|DDX4_PIG | 78809.8 | Probable ATP-dependent RNA helicase DDX4 OS=Sus scrofa OX=9823 GN=DDX4 PE=2 SV=1 |
| 262 | A5JST6|RS18_CAPHI | 17718.67 | 40S ribosomal protein S18 OS=Capra hircus OX=9925 GN=RPS18 PE=2 SV=1 |
| 263 | P62272|RS18_PIG | 17718.67 | 40S ribosomal protein S18 OS=Sus scrofa OX=9823 GN=RPS18 PE=1 SV=3 |
| 264 | P81558|MBP_PIG | 18486.65 | Myelin basic protein OS=Sus scrofa OX=9823 GN=MBP PE=1 SV=1 |
| 265 | Q6R2V0|WNK1_PIG | 248975.69 | Serine/threonine-protein kinase WNK1 OS=Sus scrofa OX=9823 GN=WNK1 PE=2 SV=3 |
| 266 | O02733|IL2RA_PIG | 30436.93 | Interleukin-2 receptor subunit alpha OS=Sus scrofa OX=9823 GN=IL2RA PE=2 SV=1 |
| 267 | P02540|DESM_PIG | 53628.957 | Desmin OS=Sus scrofa OX=9823 GN=DES PE=1 SV=4 |
| 268 | Q8HXL3|WDR62_PIG | 168899.36 | WD repeat-containing protein 62 OS=Sus scrofa OX=9823 GN=WDR62 PE=3 SV=1 |
| 269 | P14639|ALBU_SHEEP | 69188.27 | Albumin OS=Ovis aries OX=9940 GN=ALB PE=1 SV=1 |
| 270 | Q29042|FCN1_PIG | 35246.156 | Ficolin-1 OS=Sus scrofa OX=9823 GN=FCN1 PE=1 SV=1 |
| 271 | Q29214|RLA0_PIG | 34358.605 | 60S acidic ribosomal protein P0 OS=Sus scrofa OX=9823 GN=RPLP0 PE=1 SV=2 |
| 272 | W5PFI3|NNTM_SHEEP | 113878.64 | NAD(P) transhydrogenase, mitochondrial OS=Ovis aries OX=9940 GN=NNT PE=1 SV=2 |
| 273 | Q19AZ8|THRB_PIG | 70066.18 | Prothrombin OS=Sus scrofa OX=9823 GN=F2 PE=2 SV=1 |
| 274 | Q6B7M7|COF1_SHEEP | 18518.549 | Cofilin-1 OS=Ovis aries OX=9940 GN=CFL1 PE=2 SV=3 |
| 275 | P10668|COF1_PIG | 18518.549 | Cofilin-1 OS=Sus scrofa OX=9823 GN=CFL1 PE=1 SV=3 |
| 276 | Q8HZK2|DUOX2_PIG | 175284.17 | Dual oxidase 2 OS=Sus scrofa OX=9823 GN=DUOX2 PE=1 SV=2 |
| 277 | Q00555|CFTR_SHEEP | 167926.55 | Cystic fibrosis transmembrane conductance regulator OS=Ovis aries OX=9940 GN=CFTR PE=1 SV=2 |
| 278 | Q6PQZ2|CFTR_PIG | 168187.77 | Cystic fibrosis transmembrane conductance regulator OS=Sus scrofa OX=9823 GN=CFTR PE=2 SV=1 |
| 279 | Q09YJ4|CFTR_MUNMU | 167956.47 | Cystic fibrosis transmembrane conductance regulator OS=Muntiacus muntjak OX=9888 GN=CFTR PE=3 SV=1 |
| 280 | Q07DW5|CFTR_MUNRE | 167914.44 | Cystic fibrosis transmembrane conductance regulator OS=Muntiacus reevesi OX=9886 GN=CFTR PE=3 SV=1 |
| 281 | A5A8V7|HS71L_PIG | 70343.93 | Heat shock 70 kDa protein 1-like OS=Sus scrofa OX=9823 GN=HSPA1L PE=2 SV=1 |
| 282 | F1S668|RGS16_PIG | 22473.287 | Regulator of G-protein signaling 16 OS=Sus scrofa OX=9823 GN=RGS16 PE=1 SV=3 |
| 283 | P01191|COLI_SHEEP | 29061.705 | Pro-opiomelanocortin OS=Ovis aries OX=9940 GN=POMC PE=1 SV=3 |
| 284 | P01192|COLI_PIG | 28894.502 | Pro-opiomelanocortin OS=Sus scrofa OX=9823 GN=POMC PE=1 SV=1 |
| 285 | Q767M0|PPR18_PIG | 67962.33 | Phostensin OS=Sus scrofa OX=9823 GN=PPP1R18 PE=3 SV=1 |
| 286 | O02840|CADH5_PIG | 87546.34 | Cadherin-5 OS=Sus scrofa OX=9823 GN=CDH5 PE=2 SV=1 |
| 287 | Q2XQV4|ALDH2_PIG | 56920.895 | Aldehyde dehydrogenase, mitochondrial OS=Sus scrofa OX=9823 GN=ALDH2 PE=2 SV=1 |
| 288 | P22793|TRHY_SHEEP | 201173.02 | Trichohyalin OS=Ovis aries OX=9940 GN=TCHH PE=2 SV=2 |
| 289 | Q9GKQ6|PGS1_PIG | 30457.049 | Biglycan (Fragments) OS=Sus scrofa OX=9823 GN=BGN PE=2 SV=2 |
| 290 | O46390|PGS1_SHEEP | 41523.03 | Biglycan OS=Ovis aries OX=9940 GN=BGN PE=2 SV=1 |
| 291 | P02543|VIME_PIG | 53667.676 | Vimentin OS=Sus scrofa OX=9823 GN=VIM PE=1 SV=2 |
| 292 | Q007T0|SDHB_PIG | 31585.57 | Succinate dehydrogenase [ubiquinone] iron-sulfur subunit, mitochondrial OS=Sus scrofa OX=9823 GN=SDHB PE=1 SV=1 |
| 293 | O77727|K1C15_SHEEP | 48770.03 | Keratin, type I cytoskeletal 15 OS=Ovis aries OX=9940 GN=KRT15 PE=2 SV=1 |
| 294 | P02534|K1M1_SHEEP | 46674.367 | Keratin, type I microfibrillar 48 kDa, component 8C-1 OS=Ovis aries OX=9940 PE=1 SV=2 |
| 295 | B0LKP1|KRT35_SHEEP | 50455.92 | Keratin, type I cuticular Ha5 OS=Ovis aries OX=9940 GN=KRT35 PE=2 SV=1 |
| 296 | Q8MI35|NPW_PIG | 16346.96 | Neuropeptide W OS=Sus scrofa OX=9823 GN=NPW PE=1 SV=1 |
| 297 | P03974|TERA_PIG | 89288.73 | Transitional endoplasmic reticulum ATPase OS=Sus scrofa OX=9823 GN=VCP PE=1 SV=5 |
| 298 | O77642|1433S_SHEEP | 27849.123 | 14-3-3 protein sigma OS=Ovis aries OX=9940 GN=SFN PE=2 SV=1 |
| 299 | P12263|FA8_PIG | 239305.27 | Coagulation factor VIII OS=Sus scrofa OX=9823 GN=F8 PE=1 SV=2 |
| 300 | Q29577|KCRU_PIG | 46949.67 | Creatine kinase U-type, mitochondrial OS=Sus scrofa OX=9823 GN=CKMT1 PE=2 SV=2 |
| 301 | Q9TV36|FBN1_PIG | 312698.84 | Fibrillin-1 OS=Sus scrofa OX=9823 GN=FBN1 PE=2 SV=1 |
| 302 | F1RRV3|THYG_PIG | 293030.22 | Thyroglobulin OS=Sus scrofa OX=9823 GN=TG PE=1 SV=5 |
| 303 | P29361|1433Z_SHEEP | 27856.246 | 14-3-3 protein zeta/delta OS=Ovis aries OX=9940 GN=YWHAZ PE=1 SV=1 |
| 304 | Q4PR21|CCL25_PIG | 16877.764 | C-C motif chemokine 25 OS=Sus scrofa OX=9823 GN=CCL25 PE=2 SV=1 |
| 305 | Q5GN48|DMD_PIG | 424858.44 | Dystrophin OS=Sus scrofa OX=9823 GN=DMD PE=1 SV=1 |
| 306 | Q9GMB0|RPN1_PIG | 68694.7 | Dolichyl-diphosphooligosaccharide--protein glycosyltransferase subunit 1 OS=Sus scrofa OX=9823 GN=RPN1 PE=1 SV=1 |
| 307 | P68137|ACTS_PIG | 42051.027 | Actin, alpha skeletal muscle OS=Sus scrofa OX=9823 GN=ACTA1 PE=1 SV=1 |
| 308 | P29331|MYOD1_SHEEP | 34209.055 | Myoblast determination protein 1 OS=Ovis aries OX=9940 GN=MYOD1 PE=2 SV=1 |
| 309 | P49811|MYOD1_PIG | 34243.027 | Myoblast determination protein 1 OS=Sus scrofa OX=9823 GN=MYOD1 PE=3 SV=1 |
| 310 | P62802|H4_PIG | 11367.34 | Histone H4 OS=Sus scrofa OX=9823 PE=1 SV=2 |
| 311 | P04074|AT1A1_SHEEP | 112657.805 | Sodium/potassium-transporting ATPase subunit alpha-1 OS=Ovis aries OX=9940 GN=ATP1A1 PE=1 SV=1 |
| 312 | P05024|AT1A1_PIG | 112680.84 | Sodium/potassium-transporting ATPase subunit alpha-1 OS=Sus scrofa OX=9823 GN=ATP1A1 PE=1 SV=1 |
| 313 | D2WKD8|AT1A2_PIG | 112208.35 | Sodium/potassium-transporting ATPase subunit alpha-2 OS=Sus scrofa OX=9823 GN=ATP1A2 PE=1 SV=1 |
| 314 | Q29238|CLIC1_PIG | 12184.043 | Chloride intracellular channel protein 1 (Fragment) OS=Sus scrofa OX=9823 GN=CLIC1 PE=2 SV=2 |
| 315 | O77666|TRI26_PIG | 62778.34 | Tripartite motif-containing protein 26 OS=Sus scrofa OX=9823 GN=TRIM26 PE=3 SV=2 |
| 316 | Q6R650|K1C25_CAPHI | 49423.29 | Keratin, type I cytoskeletal 25 OS=Capra hircus OX=9925 GN=KRT25 PE=2 SV=1 |
| 317 | Q9BGM5|K1C25_SHEEP | 49313.266 | Keratin, type I cytoskeletal 25 OS=Ovis aries OX=9940 GN=KRT25 PE=2 SV=1 |
| 318 | Q6R649|K1C27_CAPHI | 49961.41 | Keratin, type I cytoskeletal 27 OS=Capra hircus OX=9925 GN=KRT27 PE=2 SV=1 |
| 319 | P01025|CO3_PIG | 186806.83 | Complement C3 OS=Sus scrofa OX=9823 GN=C3 PE=1 SV=2 |
| 320 | Q6QRN9|ADT3_PIG | 32910.402 | ADP/ATP translocase 3 OS=Sus scrofa OX=9823 GN=SLC25A6 PE=2 SV=3 |
| 321 | E5FYH0|TOPZ1_SHEEP | 180026.5 | Protein TOPAZ1 OS=Ovis aries OX=9940 GN=TOPAZ1 PE=1 SV=2 |
| 322 | Q767L8|MDC1_PIG | 217917.28 | Mediator of DNA damage checkpoint protein 1 OS=Sus scrofa OX=9823 GN=MDC1 PE=3 SV=1 |
| 323 | Q52NJ1|RB11A_PIG | 24393.518 | Ras-related protein Rab-11A OS=Sus scrofa OX=9823 GN=RAB11A PE=2 SV=3 |
| 324 | P80021|ATPA_PIG | 59687.637 | ATP synthase subunit alpha, mitochondrial OS=Sus scrofa OX=9823 GN=ATP5F1A PE=1 SV=2 |
| 325 | Q71LE2|H33_PIG | 15327.907 | Histone H3.3 OS=Sus scrofa OX=9823 GN=H3-3A PE=2 SV=3 |
| 326 | Q09YI1|CTTB2_SHEEP | 178219.61 | Cortactin-binding protein 2 OS=Ovis aries OX=9940 GN=CTTNBP2 PE=3 SV=1 |
| 327 | P01965|HBA_PIG | 15039.134 | Hemoglobin subunit alpha OS=Sus scrofa OX=9823 GN=HBA PE=1 SV=1 |
| 328 | Q09YJ3|CTTB2_MUNMU | 178143.58 | Cortactin-binding protein 2 OS=Muntiacus muntjak OX=9888 GN=CTTNBP2 PE=3 SV=1 |
| 329 | P68239|HBA_AMMLE | 15164.3545 | Hemoglobin subunit alpha-1/2 OS=Ammotragus lervia OX=9899 PE=1 SV=2 |
| 330 | P0CH25|HBA1_CAPHI | 15164.3545 | Hemoglobin subunit alpha-1 OS=Capra hircus OX=9925 GN=HBA1 PE=1 SV=1 |
| 331 | P68240|HBA_SHEEP | 15164.3545 | Hemoglobin subunit alpha-1/2 OS=Ovis aries OX=9940 PE=1 SV=2 |
| 332 | P21379|HBA_RANTA | 15101.219 | Hemoglobin subunit alpha OS=Rangifer tarandus OX=9870 GN=HBA PE=1 SV=1 |
| 333 | P01971|HBA_ALCAA | 15246.438 | Hemoglobin subunit alpha OS=Alces alces alces OX=9853 GN=HBA PE=1 SV=2 |
| 334 | P0CH26|HBA2_CAPHI | 15191.337 | Hemoglobin subunit alpha-2 OS=Capra hircus OX=9925 GN=HBA2 PE=1 SV=1 |
| 335 | P00761|TRYP_PIG | 24409.47 | Trypsin OS=Sus scrofa OX=9823 PE=1 SV=1 |
| 336 | P02067|HBB_PIG | 16165.56 | Hemoglobin subunit beta OS=Sus scrofa OX=9823 GN=HBB PE=1 SV=3 |
| 337 | P28491|CALR_PIG | 48287.84 | Calreticulin OS=Sus scrofa OX=9823 GN=CALR PE=1 SV=3 |
| 338 | P02073|HBB_ALCAA | 16222.608 | Hemoglobin subunit beta OS=Alces alces alces OX=9853 GN=HBB PE=1 SV=1 |
| 339 | P62297|ASPM_SHEEP | 395759.2 | Abnormal spindle-like microcephaly-associated protein homolog (Fragment) OS=Ovis aries OX=9940 GN=ASPM PE=2 SV=1 |
| 340 | P16960|RYR1_PIG | 565332 | Ryanodine receptor 1 OS=Sus scrofa OX=9823 GN=RYR1 PE=2 SV=2 |
| 341 | P19620|ANXA2_PIG | 38541.695 | Annexin A2 OS=Sus scrofa OX=9823 GN=ANXA2 PE=1 SV=4 |
| 342 | A2SW69|ANXA2_SHEEP | 38612.066 | Annexin A2 OS=Ovis aries OX=9940 GN=ANXA2 PE=1 SV=1 |
| 343 | Q2Q1M6|ANXA2_CEREL | 38636.6 | Annexin A2 OS=Cervus elaphus OX=9860 GN=ANXA2 PE=2 SV=1 |
| 344 | P02074|HBB_ODOVI | 15824.191 | Hemoglobin subunit beta-3 OS=Odocoileus virginianus virginianus OX=9875 GN=HBB PE=1 SV=1 |
| 345 | P21380|HBB_RANTA | 16166.544 | Hemoglobin subunit beta OS=Rangifer tarandus OX=9870 GN=HBB PE=1 SV=1 |
| 346 | P02075|HBB_SHEEP | 16073.434 | Hemoglobin subunit beta OS=Ovis aries OX=9940 GN=HBB PE=1 SV=2 |
| 347 | Q6QAQ1|ACTB_PIG | 41736.73 | Actin, cytoplasmic 1 OS=Sus scrofa OX=9823 GN=ACTB PE=1 SV=2 |
| 348 | P60713|ACTB_SHEEP | 41736.73 | Actin, cytoplasmic 1 OS=Ovis aries OX=9940 GN=ACTB PE=2 SV=1 |


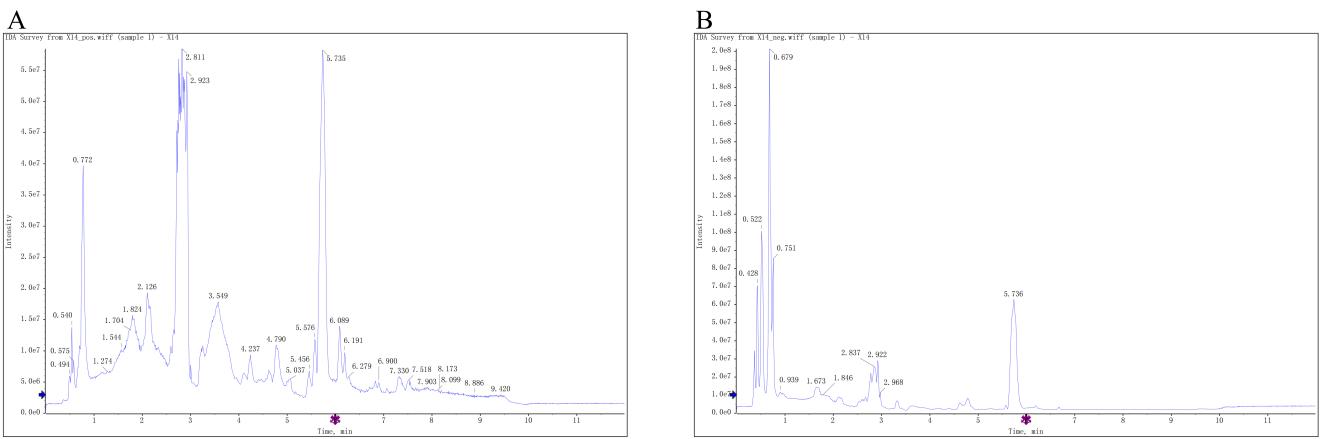


**Figure S1**. The total ions chromatography (TIC) of serum sample of CIA model rat. (A) positive ion mode and (B) negative ion mode.


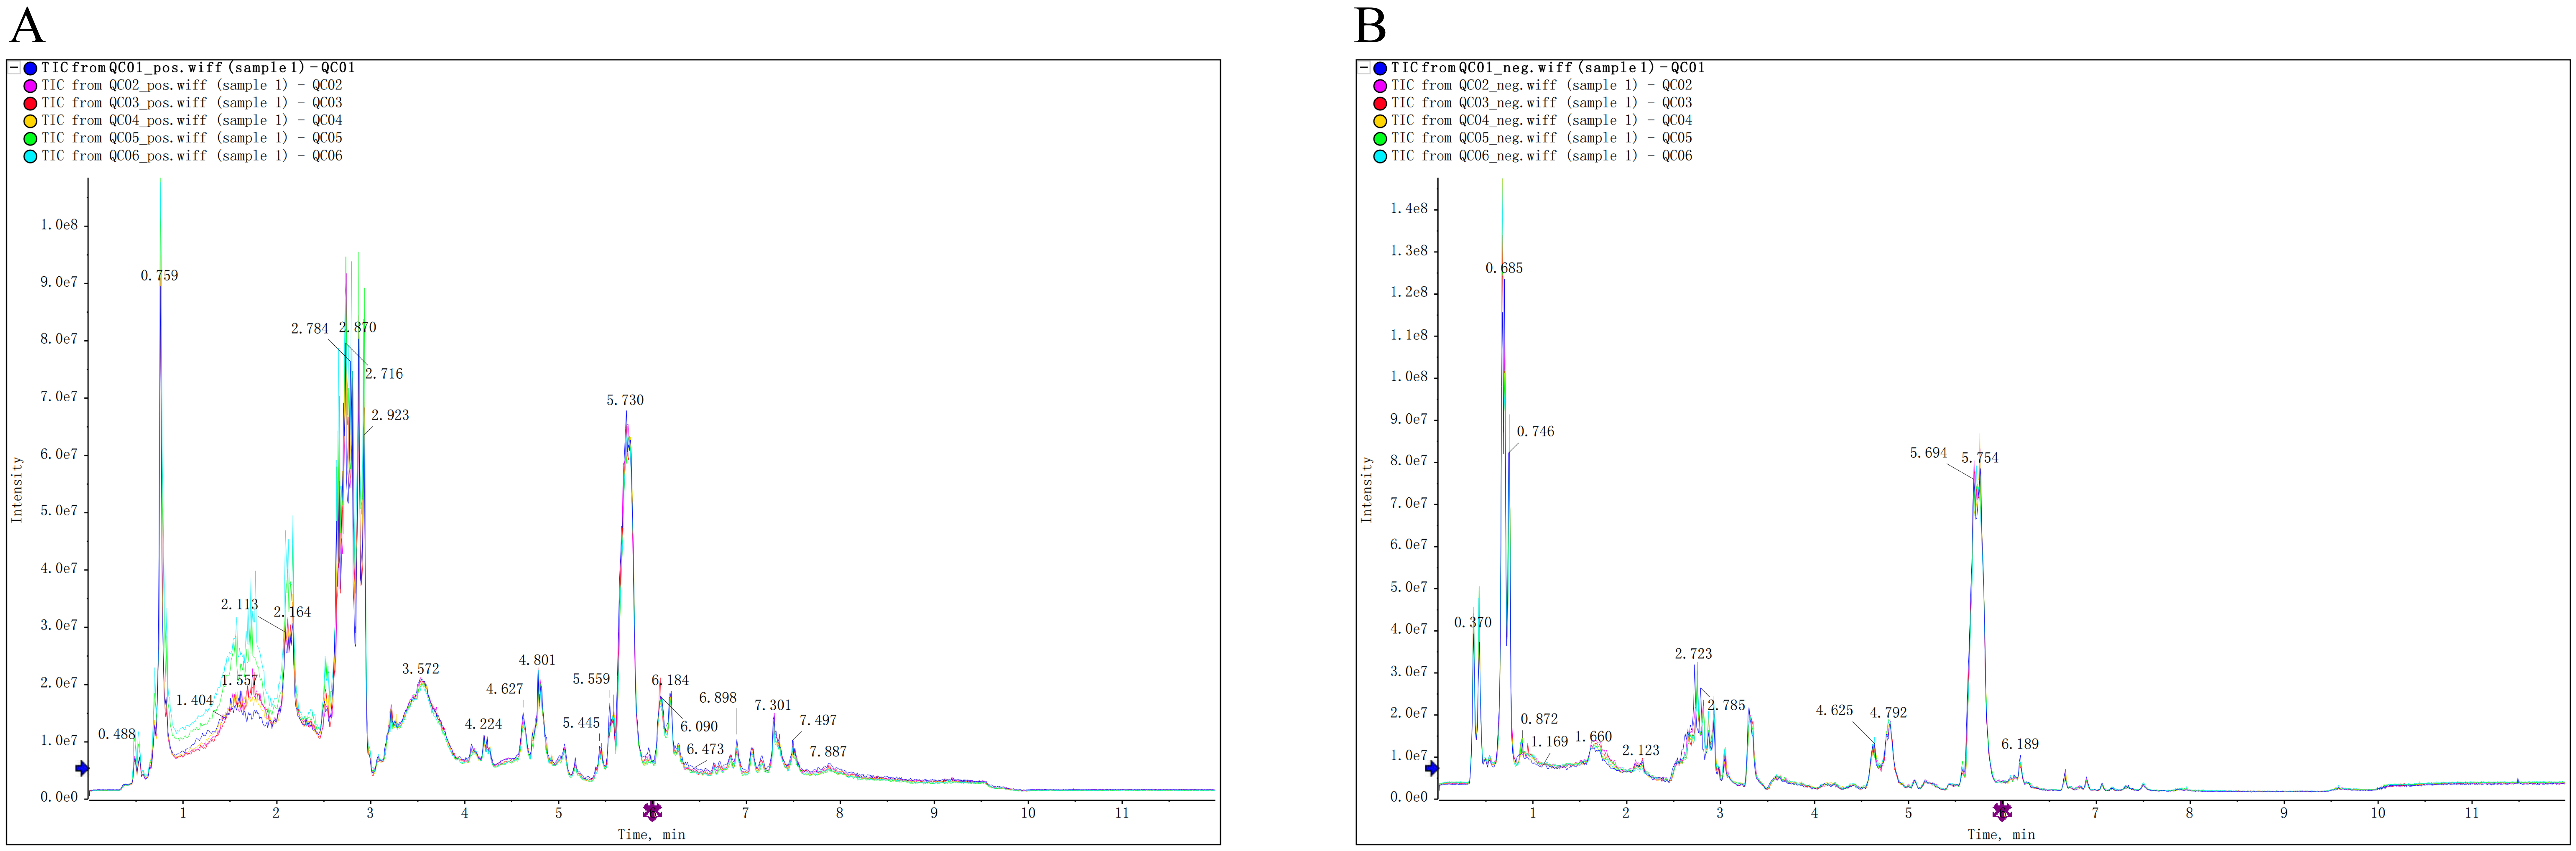


**Figure S2**. The total ions chromatography (TIC) of Quality control (QC) sample. (A) positive ion mode and (B) negative ion mode.


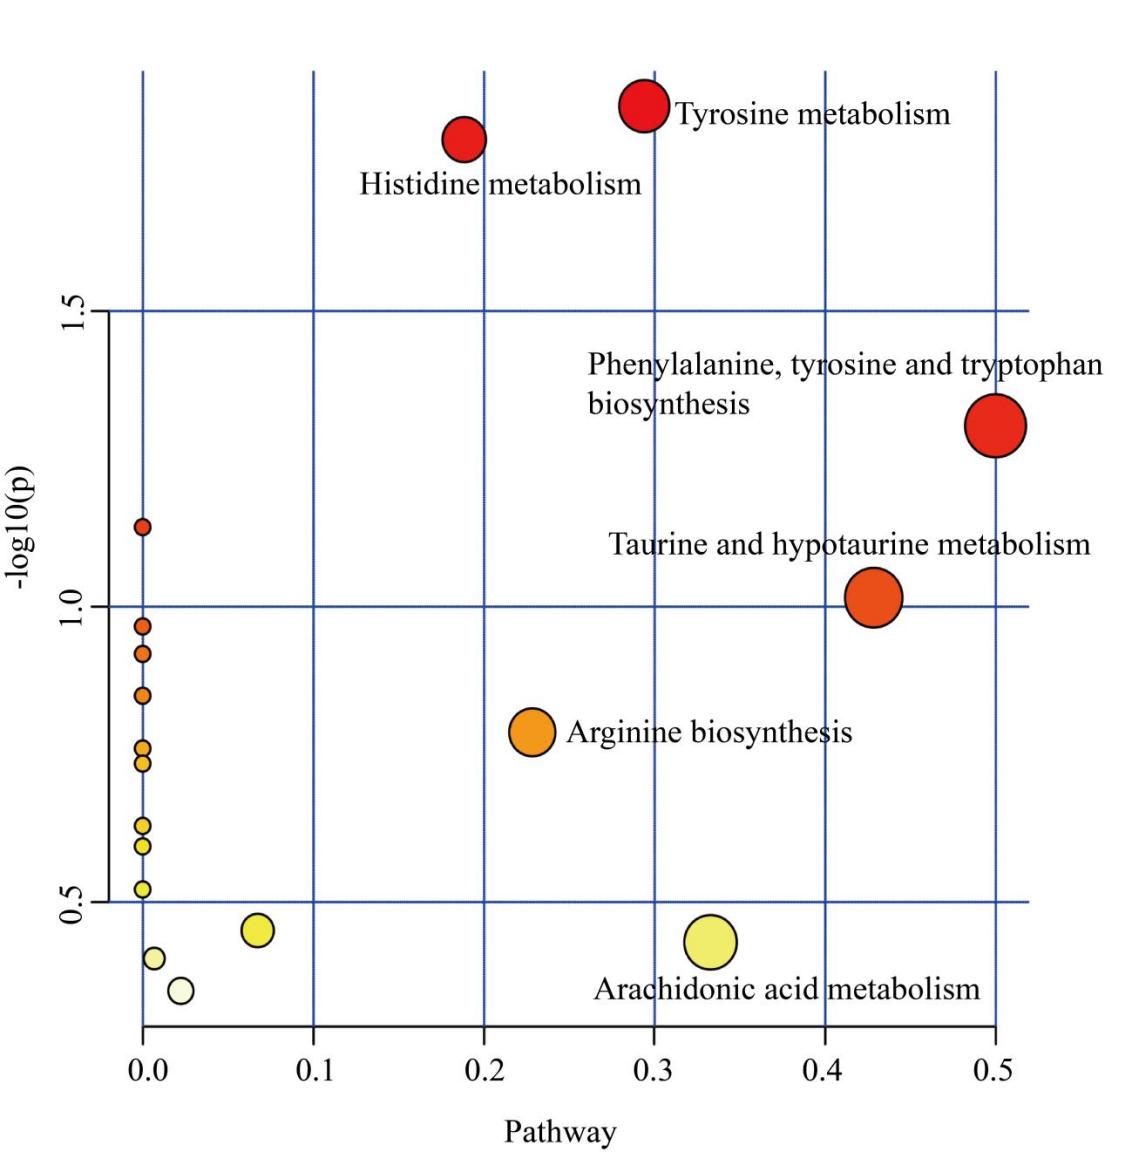


**Figure S3**. The pathway impact prediction of MetaboAnalyst 5.0 online database between normal and CIA model groups. The top 3 pathways with major changes (*P* < 0.05) were identified. Bubble color represents the *P* value: deeper colors represent smaller *P* values, indicating larger differences. The size of the bubble represents the impact of the pathway during topological analysis. Larger size represents higher impact.

**Table S2.** Identification of potential biomarkers in rat serum.

| No. | Metabolite Identification | *m/z* | ESI | CIA model vs JTG-180mg/kg | | CIA model vs JTG-720mg/kg | |
| --- | --- | --- | --- | --- | --- | --- | --- |
| FC | Trend | FC | Trend |
| 1 | 4,7,10,13,16,19-Docosahexaenoic acid | 327.2320 | [M-H]- | 1.53 | **↓*** | 259.37 | **↓**** |
| 2 | gamma-L-Glutamyl-L-phenylalanine | 295.1334 | [M+H] + | 0.35 | **↑*** | 0.23 | **↑**** |
| 3 | L-Tyrosine | 182.0808 | [M+H] + | 0.71 | **↑**** | 0.56 | **↑**** |
| 4 | Lys-Thr | 230.1496 | [M+H] + | 0.65 | **↑*** | 0.55 | **↑**** |
| 5 | Arg-Met | 305.1452 | [M+H] + | 0.73 | **↑*** | 0.62 | **↑**** |
| 6 | Arg-Thr | 339.1767 | [M+H] + | 0.62 | **↑*** | 0.48 | **↑**** |
| 7 | Ile-Tyr | 294.1566 | [M+H] + | 0.71 | **↑*** | 0.49 | **↑**** |
| 8 | Leu-Thr | 296.1603 | [M+H] + | 0.69 | **↑*** | 0.47 | **↑**** |
| 9 | Val-Pro | 278.1500 | [M+H] + | 0.69 | **↑*** | 0.52 | **↑**** |
| 10 | N-Acetylaspartylglutamate | 305.1041 | [M+H] + | 0.60 | **↑*** | 0.40 | **↑**** |
| 11 | Glutaraldehyde | 123.0435 | [M+H] + | 0.86 | **↑*** | 0.97 | **↑** |
| 12 | Dopamine | 136.0753 | [M+H] + | 0.80 | **↑*** | 0.94 | **↑** |
| 13 | Histamine | 112.0863 | [M+H] + | 1.58 | **↓*** | 1.51 | **↓** |
| 14 | Cytidine | 244.0940 | [M-H]- | 1.11 | **↓** | 1.38 | **↓**** |
| 15 | D-Ribose | 149.0446 | [M-H]- | 1.07 | **↓** | 34.05 | **↓**** |
| 16 | 2-hydroxy-butanoic acid | 103.0394 | [M-H]- | 0.98 | **↑** | 0.01 | **↑**** |
| 17 | L-Citrulline | 174.0915 | [M-H]- | 0.67 | **↑** | 0.16 | **↑**** |
| 18 | L-Galactono-1,4-lactone | 237.1483 | [M-H]- | 0.59 | **↑** | 0.02 | **↑**** |
| 19 | Dihydroxyacetone | 71.0136 | [M-H]- | 1.16 | **↓** | 2.53 | **↓**** |
| 20 | D-Quinovose | 223.0815 | [M-H]- | 2.02 | **↓** | 10.36 | **↓**** |
| 21 | 3-Methylhistidine | 170.0922 | [M+H] + | 0.77 | **↑** | 0.62 | **↑**** |
| 22 | Val-Tyr | 280.1410 | [M+H] + | 0.88 | **↑** | 0.52 | **↑**** |
| 23 | Phe-Tyr | 328.1397 | [M+H] + | 0.85 | **↑** | 0.57 | **↑**** |
| 24 | 16-Hydroxypalmitic acid | 271.2266 | [M-H]- | 0.71 | **↑** | 0.08 | **↑**** |
| 25 | Ribothymidine | 259.0931 | [M+H] + | 0.92 | **↑** | 0.79 | **↑*** |
| 26 | N-Acetylglutamin | 233.0510 | [M+H] + | 0.91 | **↑** | 0.70 | **↑**** |
| 27 | Taurine | 126.0223 | [M+H] + | 1.37 | **↓** | 2.04 | **↓**** |
| 28 | Nicotinate | 124.0384 | [M+H] + | 0.96 | **↑** | 0.81 | **↑*** |
| 29 | Tyramine | 120.0813 | [M+H] + | 1.19 | **↓** | 1.41 | **↓**** |
| 30 | Ile-Ala | 203.1389 | [M+H] + | 0.96 | **↑** | 0.58 | **↑**** |
| 31 | L-Asparagine | 131.0455 | [M-H]- | 1.01 | **↓** | 0.76 | **↑**** |
| 32 | Arachidonic Acid | 305.2435 | [M+H] + | 0.98 | **↑** | 1.58 | **↓**** |
| 33 | N4-Acetylcytidine | 286.1036 | [M+H] + | 1.02 | **↓** | 1.63 | **↓*** |
| 34 | Acetylglycine | 118.0493 | [M+H] + | 1.04 | **↓** | 0.84 | **↑** |
| 35 | alpha-Tocopherol | 430.3881 | [M+H] + | 1.47 | **↓** | 1.17 | **↓** |
| 36 | Dimethylglycine | 104.0704 | [M+H] + | 1.21 | **↓** | 1.31 | **↓** |
| 37 | sn-Glycerol3-phosphoethanolamine | 214.0476 | [M-H]- | 1.01 | **↓** | 0.72 | **↑** |
| 38 | Stearoylcarnitine | 428.3663 | [M+H] + | 1.15 | **↓** | 0.89 | **↑** |

FC was calculated based on mean ratios for Model vs JTG-180mg/kg, or Model vs JTG-720mg/kg. The icons**↑**,**↓** of trend represent an up-regulation and down-regulation between the two groups; meanwhile * and ** represent change [significance](javascript:void(0);) *P* < 0.05 and *P* < 0.01.





**Figure S4**. The results of serum metabolomics analysis of CIA rats treated with JTG-180 mg/kg. Statistical validation of the orthogonal partial least square discriminant analysis (OPLS-DA) model in 200 random permutation tests. Green dots are the R2 values and blue blocks are the Q2 values. Between CIA model and JTG-180 mg/kg groups: (A) Validation of OPLS-DA model in positive ion mode; (B) OPLS-DA score plot in positive ion mode; (C) An S-plot of the CIA model and JTG-180 mg/kg groups. The pathway impact prediction of MetaboAnalyst 5.0 online database between CIA model and JTG-180 mg/kg groups: (D) Bubble diagram. Bubble color represents the *P*-value: deeper colors represent smaller *P* values, indicating larger differences. The size of the bubble represents the impact of the pathway during topological analysis. Larger size represents a higher impact; (E) Heat map of the differential metabolites in model and JTG-180 mg/kg groups. Each cell in the heat map represented the fold change between the two groups: blue color represented the metabolite expression down-regulation, and red color represented the metabolite expression up-regulation.


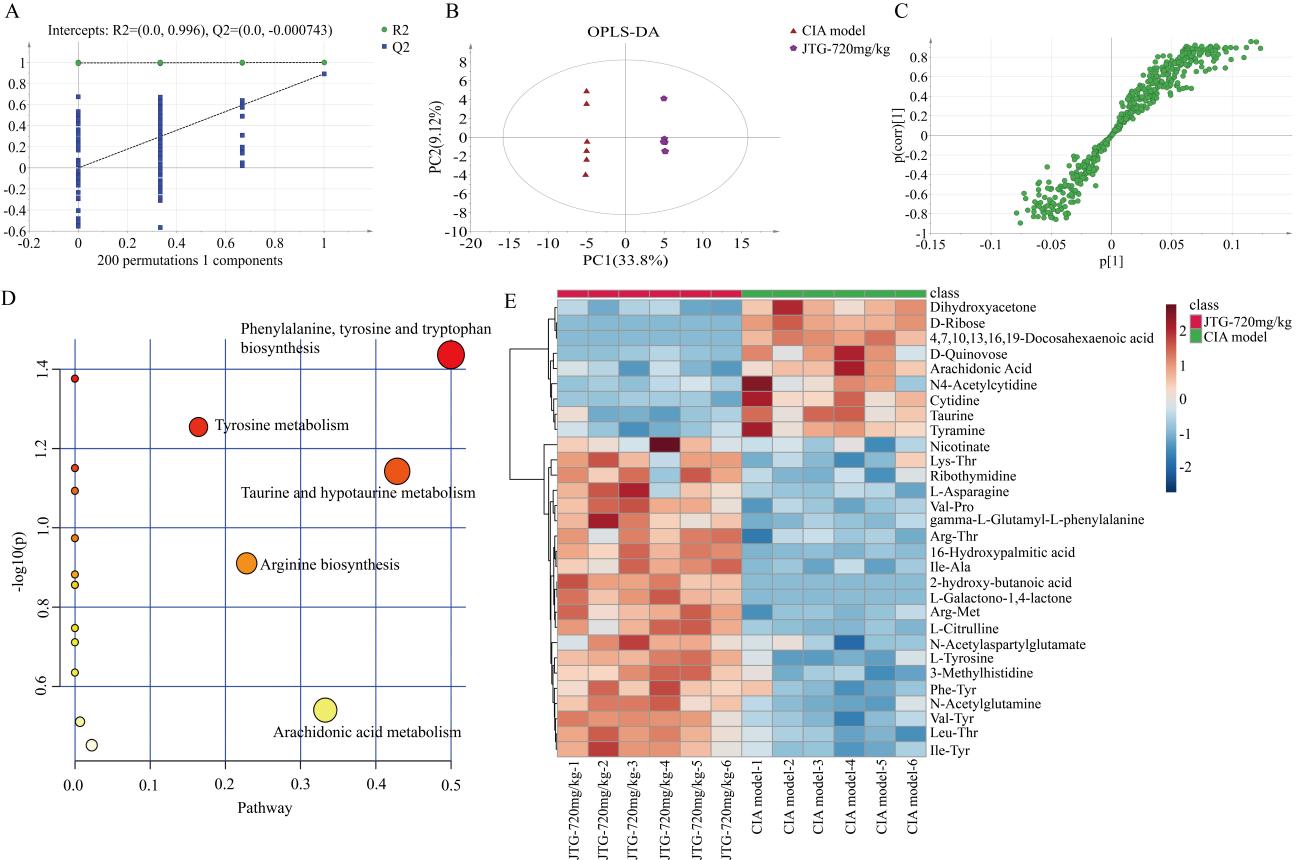


**Figure S5**. The results of serum metabolomics analysis of CIA rats treated with JTG-720 mg/kg. Statistical validation of the orthogonal partial least square discriminant analysis (OPLS-DA) model in 200 random permutation tests. Green dots are the R2 values and blue blocks are the Q2 values. Between CIA model and JTG-720 mg/kg groups: (A) Validation of OPLS-DA model in positive ion mode; (B) OPLS-DA score plot in positive ion mode; (C) An S-plot of the model and JTG-720 mg/kg groups. The pathway impact prediction of MetaboAnalyst 5.0 online database between CIA model and JTG-720 mg/kg groups: (D) Bubble diagram. Bubble color represents the *P*-value: deeper colors represent smaller *P* values, indicating larger differences. The size of the bubble represents the impact of the pathway during topological analysis. Larger size represents a higher impact; (E) Heat map of the differential metabolites in model and JTG-720 mg/kg groups. Each cell in the heat map represented the fold change between the two groups: blue color represented the metabolite expression down-regulation, and red color represented the metabolite expression up-regulation.
